# Supplementary material for: Mesoporous carbon nitride as a metal-free catalyst for the removal of aniline
Source: Royal Society of Chemistry journal article supplement (doi:10.1039/c5ra04829j), 2015-01-01
Supplement: c5ra04829j1.pdf [file c5ra04829j1.pdf]

Supporting Information for

**Mesoporous Carbon Nitride as A Metal-free Catalyst for Removal of Aniline**

Mei Shie Sam,<sup>1</sup> Peggy Tiong,<sup>1</sup> Hendrik O. Lintang,<sup>2</sup> Siew Ling Lee,<sup>2</sup> Leny Yulianti<sup>2\*</sup>

<sup>1</sup>*Department of Chemistry, Faculty of Science, Universiti Teknologi Malaysia, 81310 UTM  
Johor Bahru, Malaysia*

<sup>2</sup>*Centre for Sustainable Nanomaterials, Ibnu Sina Institute for Scientific and Industrial  
Research, Universiti Teknologi Malaysia, 81310 UTM Johor Bahru, Malaysia*

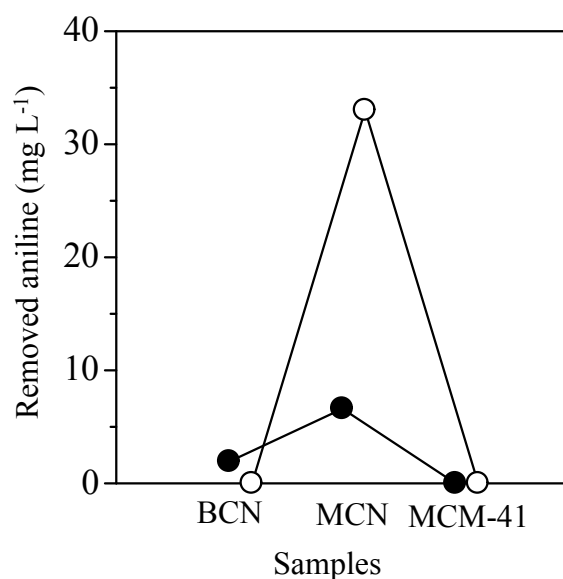

**Fig. S1** Adsorption of aniline (●) at room temperature and catalytic removal of aniline (○) at 398 K for 24 h.

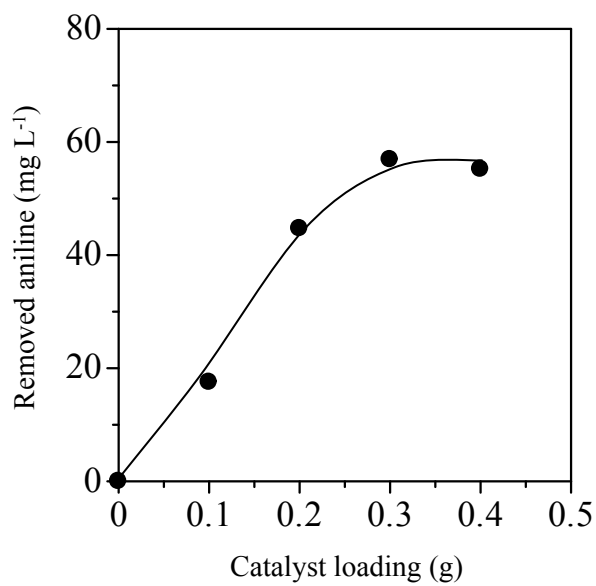

**Fig. S2** Effect of catalyst loading for the removal of aniline on the MCN at 398 K after 36 h.

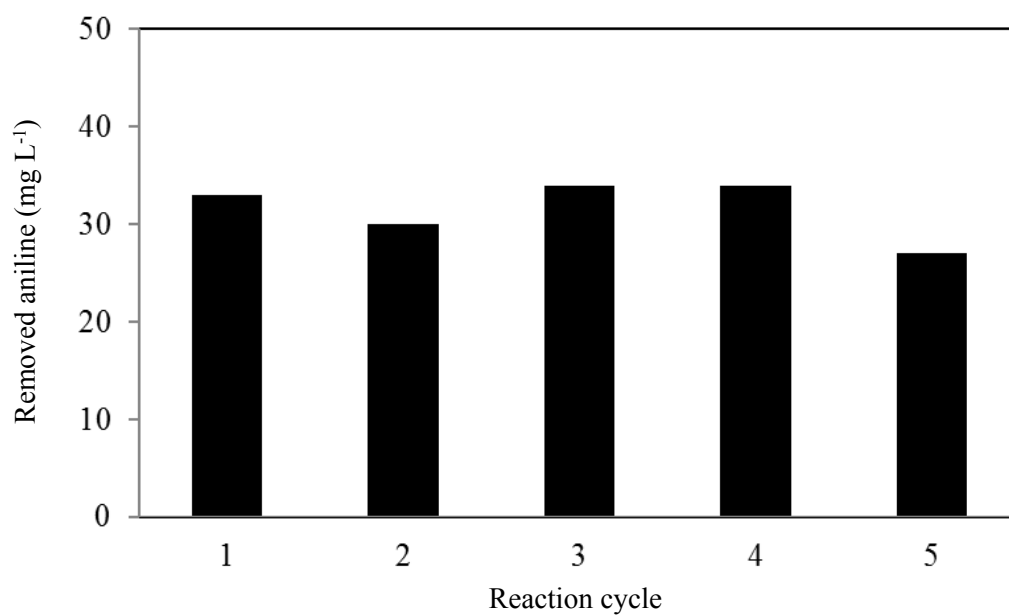

**Fig. S3** Reusability tests on the MCN catalyst for five cycle reactions. Fore each cycle, the reaction was carried out at 398 K for 24 h.

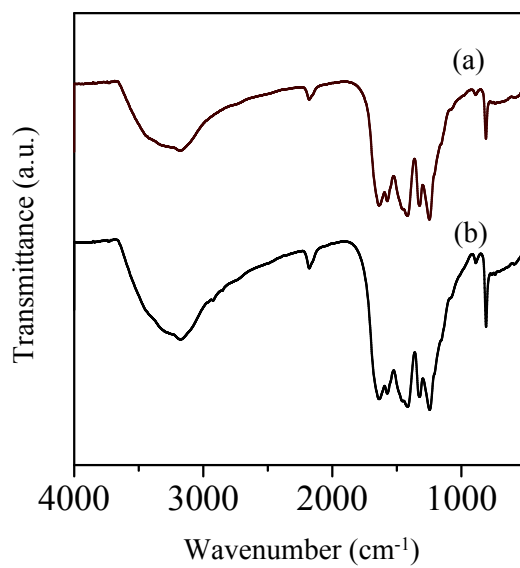

**Fig. S4** FTIR spectra of (a) fresh MCN and (b) after second cycle reaction.

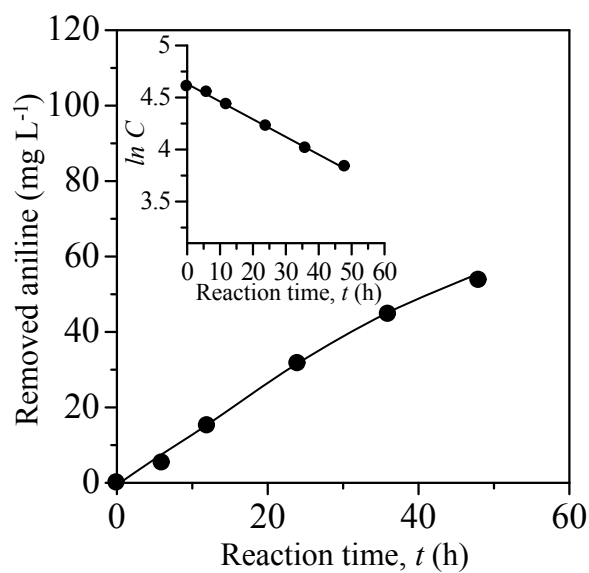

**Fig. S5** Effect of reaction time and the kinetic plot (inset) for the removal of aniline on the MCN.

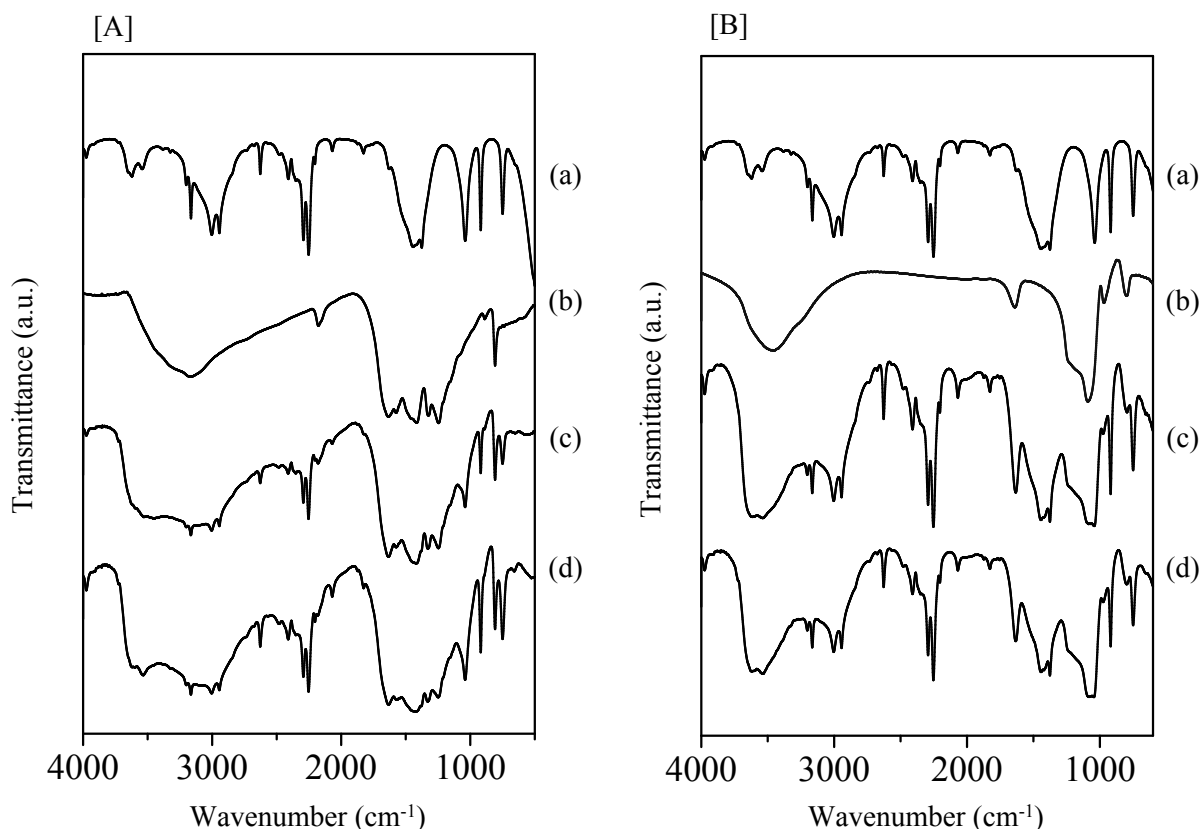

**Fig. S6** [A] FTIR spectra of (a) aniline solution, (b) BCN, (c) BCN with 0.017  $\mu\text{mol}$ , and (d) BCN with 0.043  $\mu\text{mol}$  of aniline solution, [B] FTIR spectra of (a) aniline solution, (b) MCM-41, (c) MCM-41 with 0.017  $\mu\text{mol}$ , and (d) MCM-41 with 0.043  $\mu\text{mol}$  of aniline solution.

**Table S1** Comparison on the intensity ratio for the improvement of N-H adsorption peaks after interactions with 0.043  $\mu\text{mol}$  of aniline solution.

| Sample | Condition    | Ratio of intensity for formation of N-H bonds to fixed wavelength <sup>a</sup> | Normalized ratio to initial condition <sup>b</sup> |
|--------|--------------|--------------------------------------------------------------------------------|----------------------------------------------------|
| BCN    | Fresh        | 0.15                                                                           | 1.0                                                |
|        | With aniline | 1.26                                                                           | 8.4                                                |
| MCN    | Fresh        | 0.29                                                                           | 1.0                                                |
|        | With aniline | 3.73                                                                           | 12.9                                               |
| MCM-41 | Fresh        | 1.38                                                                           | 1.0                                                |
|        | With aniline | 3.41                                                                           | 2.5                                                |

<sup>a</sup>The intensity for formation of N-H bonds was determined from the peak at 3618  $\text{cm}^{-1}$ . The intensity for the fixed wavelength was determined from the peak at 810  $\text{cm}^{-1}$  for BCN and MCM (the 1,3,5-substituted aromatic rings), and at 800  $\text{cm}^{-1}$  for MCM-41 (the Si-O symmetric stretching). <sup>b</sup>The normalized ratio showed the improved ratio as compared to the fresh condition.
